# Supplementary material
Source: Springer Nature journal article supplement (https://www.springermedizin.de/resource/supplementary/12885_2014_4977_MOESM5_ESM.docx/9467938)
Supplement: MOESM5 [file 9467938]

**Table 3.** Definition of risk and required surveillance in survivors at HIGH risk of a late effect.

|  | **Breast cancer** | **Colorectal cancer** | **Cardiomyopathy** |
| --- | --- | --- | --- |
| **Definition of high risk group** | Female, ≥20 Gy radiation therapy to the chest | ≥30 Gy radiation therapy to the abdomen, pelvis or spine | Anthracycline +/- chest radiation |
| **Children’s Oncology Group recommended surveillance for survivors at high risk** | Annual mammogram/MRI beginning 8 years after radiation or age 25 years, whichever occurs last | Colonoscopy every 5 years beginning at age 35 years | Echocardiogram or MUGA  Annually if anthracycline ≥300mg/m2  q 2 years if anthracycline 200-300 mg/m2 OR anthracycline <300 mg/m2 + radiation  q 5 years if anthracycline <200mg/m2 , no radiation |
